# Supplementary material for: The Severity of Diabetic Retinopathy Is an Independent Factor for the Progression of Diabetic Nephropathy
Source: PubMed Central journal article supplement (PMC7792601; doi:10.3390/jcm10010003), 2020-12-22
Supplement: jcm-10-00003-s001.pdf [file jcm-10-00003-s001.pdf]

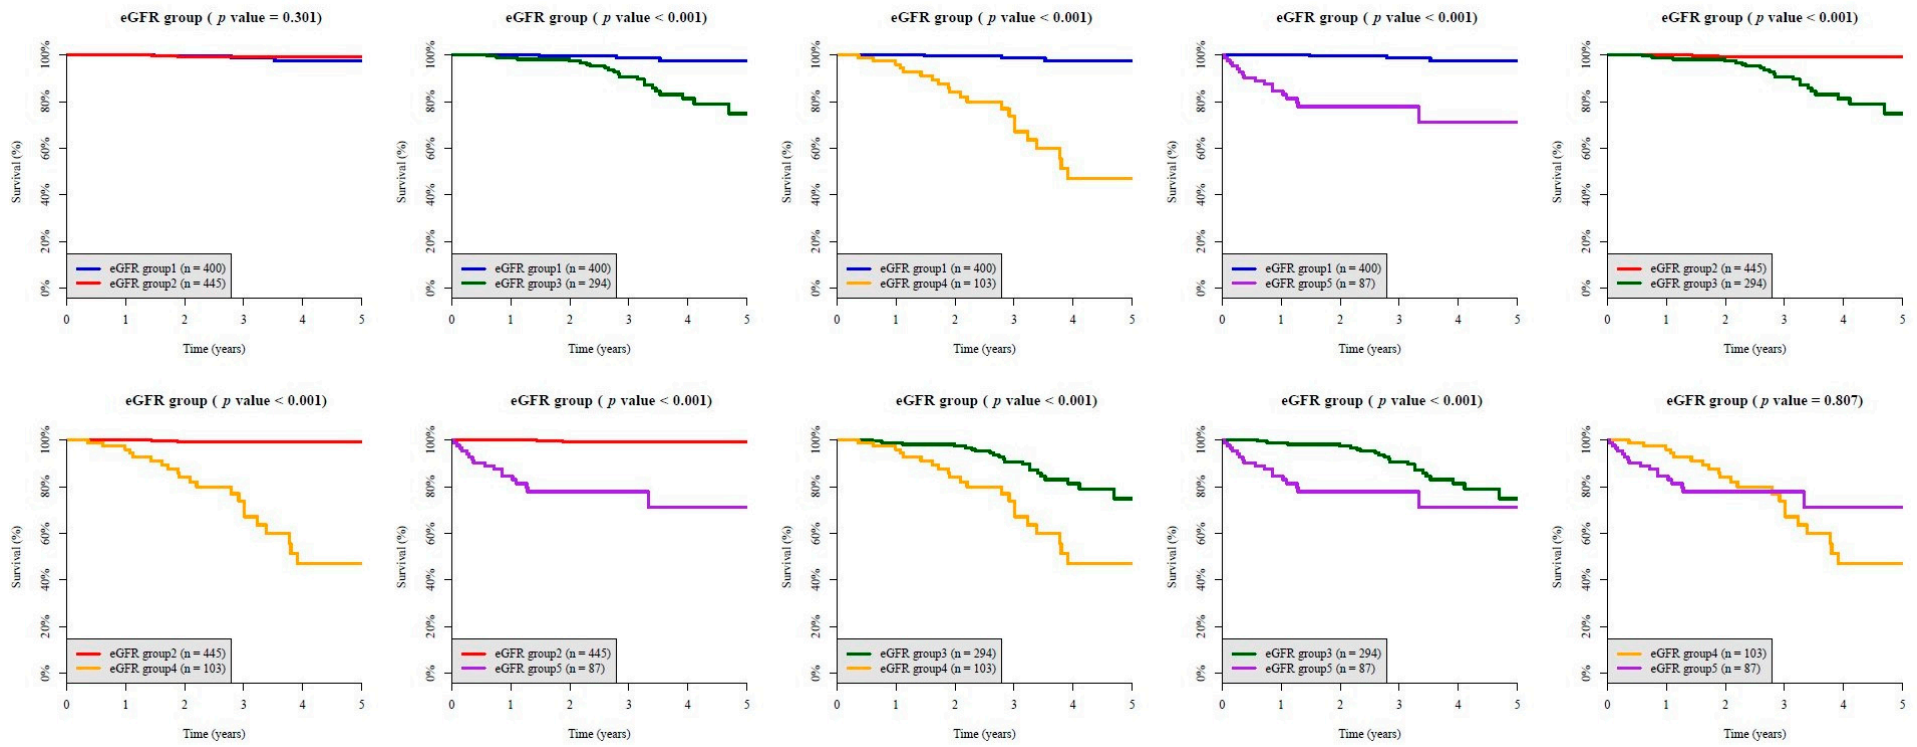

Figure 1. Kaplan–Meier survival curve, comparison of each CKD stages, showed worse baseline eGFR was related to the incidence of ESRD.

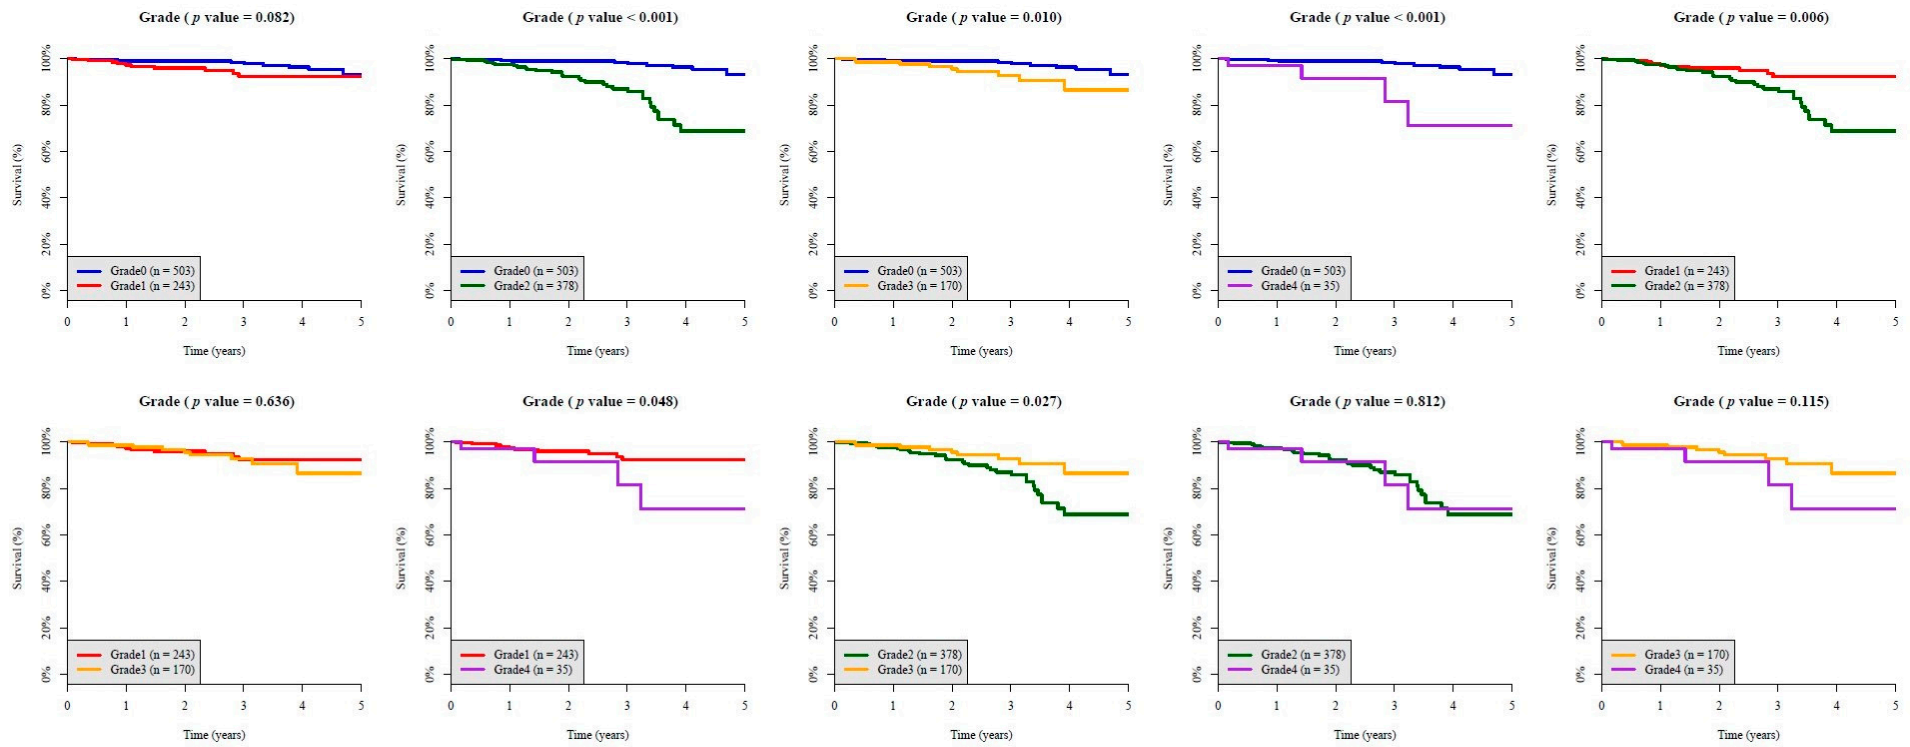

**Figure 2.** Kaplan–Meier survival curve in all enrolled participants, comparison of each DR grade, showed DR grade was related to the incidence of ESRD.

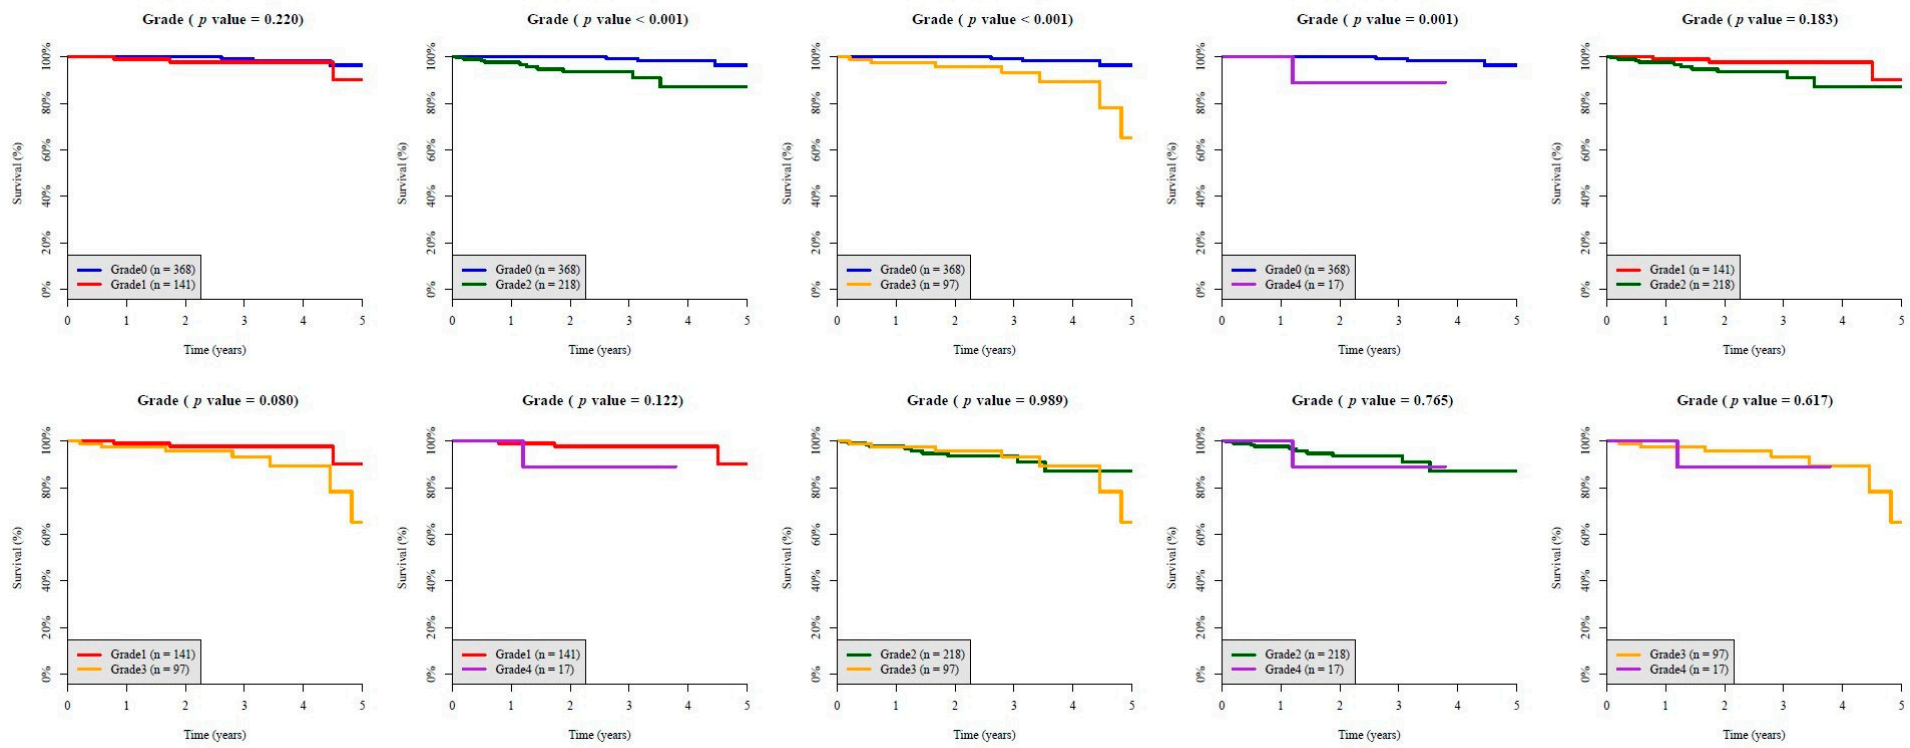

**Figure 3.** Kaplan–Meier survival curve in patient without CKD, comparison of each DR grade, showed DR grade was related to the progression to CKD.
